# Supplementary material for: Association between first birth caesarean delivery and adverse maternal-perinatal outcomes in the second pregnancy: a registry-based study in Northern Tanzania
Source: PubMed Central journal article supplement (PMC9112465; doi:10.1186/s12884-022-04719-7), 2022-05-16
Supplement: 12884_2022_4719_MOESM1_ESM.pdf [file 12884_2022_4719_MOESM1_ESM.pdf]

**Association between first birth caesarean delivery and adverse maternal-perinatal outcomes in the second pregnancy: a registry-based study in Northern Tanzania**

**Raziya Gaffur, Bariki Mchome , Lyasimana Lithaneninn Ndaninginan, Benjamin Asubiojo , Michael Johnson Mahande and Eusebious Maro.**

1 Basic information concerning mother

1.1 Mother's date of birth:  Age:  - \* Mother's name:

1.4 Hospital number:  1.3 Address:

1.6 Birth number:  1.5 Date of interview:

1.8 Date of admission:  1.7 Interview by:

Referred for delivery:  Yes if yes: zzz Referred from:  1 Home Referred during labour:  1 Admitted in labour  
 No (Set referral)  z Regional hospital  2 Admitted before labour

Reason for referral:   3 District hospital  4 Other, specify:

1.9 Official date of discharge:  1.10 Date leaving hospital:

1.11 Current residence:  1 Rural  2 Urban  3 Semi urban  
 1.12 Mother's childhood residence:  Rural  2 Urban  3 Semi urban

Area of mother's residence:  Area of mother's childhood residence:

1.13 Highest educational level:  None  2 Primary (1-7)  3 Secondary (8-11)  4 Higher (12+)  
 1.14 Current occupation:  1 Housewife  2 Farmer  3 Service  4 Business  5 Professional  6 Student  7 Others =>

1.15 Current marital status:  Married Age at first marriage:   
 z Single  3 Widowed  4 Remarried  5 Divorced  
 6 Polygamous family Add wife number:

1.16 Regular menstrual periods:  Yes Age at menarche:   
 z No

1.17 Genital mutilation {C/r/com/s/on}:  1 Yes If yes, at age:  If yes, type:  Type one  
 z No  2 Type two  \* Type three  4 Other types

1.18 Mother's tribe:  01 Chagga  2 Pare  03 Masai  4 Other

1.19 Religion:  1 Catholic  2 Protestant  3 Muslim  4 Others =>

2 Questions concerning the father of the child:

2.1 Father's name:  \*- \* Father's age:

2.3 Current occupation of father:  z1 Farmer  06 Official  0z Business  cz Professional  33 Skilled worker  06 Student  09 Unemployed  4 Unskilled worker  10 Other II  as Service

2.4 Father's educational level:  1 None  z Primary (1-7)  Secondary (8-11)  4 Higher (12+)

2.5 Father's tribe:  1 Chagga  2 Pare  z Masai  4 Others =>

3 Questions concerning home conditions:

3.1 Source of drinking water:  1 Tap water  2 Well  3 River  4 Spring

3.2 Distance to water, if not tap:  1 Less than 1 km (less than 1 hour walk)  z More than 1 km, specify in km:

3.4 Type of toilet:  Pit latrine

4 Mothers health before and during present pregnancy

4.1 Body weight (kg):  (before pregnancy)

4.2 Body height (cm):

4.3 Blood transfusions:  1 Yes  2 No

4.4 Serious diseases:  01 Diabetes  02 Hypertension  03 Heart diseases  04 Epilepsy  05 Malaria  06 Anaemia  07 Gynaecological disease  08 Liver disease (jaundice)  09 Kidney disease  10 Lung disease

4.5 Have you ever practised family planning:  1 Yes  2 No

If yes, what kind of prevention:  01 Pills  02 Injections  03 IUD  04 Condoms  05 Implant  06 Lactation  07 Withdrawal  08 Natural  09 Abstinence  10 Traditional  11 Other specify

4.6 Antenatal care in this pregnancy:  1 Yes  2 No

Number of visits:

First medical appointment date:

If date unknown, estimate first appointment:  1 0-12. week of gestation  2 13-20. week  3 21-30. week  4 After 31. week

4.7 L.M.P.:

4.8 Ultrasound:  1 Yes  2 No

4.9 E.D.D. Based on clinical estimate:

4M0 Do you smoke?  1 Yes  2 No

If yes: how many cigarettes per day:

Smoking during this pregnancy:  1 Yes  2 @0

Chewing tobacco:  1 Yes  2 No

Chewing tobacco during this pregnancy:  1 Yes  2 No

11 Do you drink alcoholic beverages?  1 Yes  2 No

If yes:  1 Every day  2 More than once a week  3 Once a week  4 Occasionally

Did you also drink alcoholic beverages during this pregnancy?  1 Yes  2 No

If yes:  1 Every day  2 More than once a week  3 Once a week  4 Occasionally

4.12 Drugs on regular basis?  1 Yes W  2 No

Did you take any drugs at time of conception or during first trimester:  1 Modern  2 Traditional  1 Yes W  2 No

Did you take any drugs during this pregnancy:  1 Yes  2 No

If yes, specify:  1 Modern  2 Traditional  1 Yes  2 No

Drugs for infertility:  1 Yes  2 No

4.15 Blood group (Ab0)

Rh:  1 Yes  2 No

Anti-D in previous pregnancies:  1 Yes  2 No

VDRL status:  1 Positive  2 Negative  3 Unknown

Hb:

Hb measurement done:  1 On Admission  2 Last visit to ANC  3 Unknown

• HIV test recorded:  1 Yes  2 No

If yes, result:  1 Negative  2 Positive

Treatment during this pregnancy:  1 Yes  2 No

4.16 Diseases and complications during present pregnancy, including accidents:  1 Yes (specify below)  2 No

01 Gestational diabetes  02 Diabetes  03 Hypertension  04 Preeclampsia, mild  05 Preeclampsia, severe  06 Eclampsia  07 Epilepsy  08 Bleeding or Anaemia  09 Hyperemesis  10 Malaria  11 Jaundice  12 Schistosomiasis  13 Gynaecological disease  14 Tromboembolic disease  15 Heart disease  16 Tuberculosis  17 Lung disease  18 Infections, specify  19 Others, specify

**f1 Questions concerning the delivery**

5.1 At birth  1 Single birth If multiple, add  Weight on admission:  5.2 Complications during delivery  1 PROM  
 2 Multiple births <sup>MO.</sup> of children:   2 Bleeding > 500mi  
 3 3-4. degree tear  
 4 Abruption of placenta  
 5 Placenta previa  
 6 Other complications

5.3 Induction of labour  1 Yes If yes:  1 Amniotomy 5.4 Others  1 Episiotomy  
 2 No  2 Oxytocin  2 Symphysiotomy  
 Prostaglandin

5.5 Analgesia:  1 Yes  Specify type other type of complication  
 2 No s.s Blood Loss (ml)

5.6 Anaesthesia:  1 General Cause of death:   
 2 Spinal/Epidural s.9 Mother's health after delivery  1 Good Perot mairtem:  1 Yes  
 2 Fair  1 No  
 3 Bad  2 No  
 4 Maternal cleath

5.7 Gestational age at birth clinical estimate

6 Status of 1. child (Always fill inn)

6.1 Date of delivery

6.2 Time of delivery

6.3 Sex  1 Male 6.4 Birth weight (Gram)   
 2 Female  
 3 Unknown, unspec. 6.5 Length (cm)  6.6 Head circum

6.7 Presentation:  1 Cephalic 6.8 Status  1 Live born  
 2 Breech  2 Live born transferred to paediatrics dept  
 3 Transverse  \* Stillborn of oo   
 4 Other  4 Neonatal death

6.9 If stillborn:  1 Dead before labour If stillborn, also specify: And: Post mortem:  
 2 Dead during labour  1 Dead before admission  1 Fresh 1 Yes  
 3 Unknown, unspec.  2 Dead after admission  2 Macerated  2 No

6.10 Apgar 1 min  5 min  10 min  If neonatal death:  1 Died within first 24 hours Date   
 2 Died within first week

6.11 Mode of delivery:  1 Spontaneous  2 CS elective Indication when Caesarean section:   
 3 Vacuum, vaginal  3 CS others  
 4 Forceps, vaginal  4 Assisted breech  5 Destructive operative  
**6.1z Failed intervention**  1 Vacuum  
 2 Forceps

6.13 Does the child have any of these conditions?  1 Birth defects  
 2 Injuries  
 3 Diseases  
 4 HIV Positive

**Status on 2x child (For multiple births - not for singletons, if more than twins add extra copy of this page)**

< 1 Date of delivery

> 2 Time of delivery

6.7 Presentation:  1 Cephalic s.s 3t t  1 Live born  
 2 Breech  2 Live born transferred to paediatrics dept  
 3 Transverse  \* Stillborn of oo   
 4 Other  \* Neonatal death

6.8 If stillborn:  1 Dead before labour If stillborn, also specify: And: Post mortem:  
 2 Dead during labour  1 Dead before admission  1 Fresh 1 Yes  
 3 Unknown, unspec.  2 Dead after admission  2 Macerated  2 No

6.10 Apgar 1 min  5 min  10 min  If neonatal death:  1 Died within first 24 hours Date   
 2 Died within first week

6.11 Mode of delivery:  1 Spontaneous  2 CS elective Indication when caesarean section:   
 3 Vacuum, vaginal  3 CS others  
 4 Forceps, vaginal  4 Assisted breech  5 Destructive operative  
**6.1z Failed intervention**  1 Vacuum  
 2 Forceps

6.13 Does the child have any of these conditions?  1 Birth defects  
 2 Injuries  
 3 Diseases  
 4 HIV Positive

7 Previous pregnancies including abortions in chronological order

| CA     | C2   | C3      | C4     | C5           | C6  | C7               | C8             | C9          | C10  | C11 | C12         | C13            | C14 |
|--------|------|---------|--------|--------------|-----|------------------|----------------|-------------|------|-----|-------------|----------------|-----|
| bfs.no | Year | Outcome | Months | Birth weight | Sex | Lactation months | Delivery where | Attended by | Mode | ANC | Alive/Death | Cause of death | Age |
| 1      |      |         |        |              |     |                  |                |             |      |     |             |                |     |
| 2      |      |         |        |              |     |                  |                |             |      |     |             |                |     |
| 3      |      |         |        |              |     |                  |                |             |      |     |             |                |     |
| 4      |      |         |        |              |     |                  |                |             |      |     |             |                |     |
| 5      |      |         |        |              |     |                  |                |             |      |     |             |                |     |
| 6      |      |         |        |              |     |                  |                |             |      |     |             |                |     |
| 7      |      |         |        |              |     |                  |                |             |      |     |             |                |     |
| 8      |      |         |        |              |     |                  |                |             |      |     |             |                |     |
| 9      |      |         |        |              |     |                  |                |             |      |     |             |                |     |
| 10     |      |         |        |              |     |                  |                |             |      |     |             |                |     |
| 11     |      |         |        |              |     |                  |                |             |      |     |             |                |     |
| 12     |      |         |        |              |     |                  |                |             |      |     |             |                |     |
| 13     |      |         |        |              |     |                  |                |             |      |     |             |                |     |
| 14     |      |         |        |              |     |                  |                |             |      |     |             |                |     |
| 15     |      |         |        |              |     |                  |                |             |      |     |             |                |     |
| 16     |      |         |        |              |     |                  |                |             |      |     |             |                |     |
| 17     |      |         |        |              |     |                  |                |             |      |     |             |                |     |
| 18     |      |         |        |              |     |                  |                |             |      |     |             |                |     |
| 19     |      |         |        |              |     |                  |                |             |      |     |             |                |     |
| C1     | C2   | C3      | C4     | C5           | C6* | C7               | C8             | C9          | C10  | C11 | C12         | C13            | C14 |

- C1 Pregnancy number
- C2 Year of pregnancy. (Birth or other termination) PP: Present pregnancy
- C3 Outcome of pregnancy. (L) Live born, (S) Stillborn, (A) Spontaneous abortion, (I) Induced abortion (E) Ectopic. (M) Molar, (T) Twins or other multiples", (0) Other
- C4 Months of gestation at birth or other termination.
- C5 Birth weight in grams
- C6 Sex: (M) Male, (F) Female, (U) Unknown
- C7 Lactation: In months
- C8 Delivered where (1) At home, (2) At hospital, (3) At health post, (4) During transport, (5) Other / unknown
- C9 Attended by whom: (R) Relative, (N) Nurse, (M) Midwife, (D) Doctor, (T) Traditional birth attendant
- C10 Mode (S) Spontaneous, (V) Vacuum, (F) Forceps, (C) Cesarean section, (B) Breech, (0) Other, (9) Unknown
- C11 Antenatal care: (Y) Yes, (N) No
- C12 Child's current status: (A) Alive, (D) Dead
- C13 Cause of death: Specify
- C14 Age: (1) Less than one week, (2) Less than one month, (3) Less than one year, (4) More than one year

\* Multiple births (TwinS, Triples ...) are filled in on subsequent lines
